# Supplementary material
Source: MDPI journal article supplement (https://www.mdpi.com/2073-445X/12/5/993)
Supplement: s1 [file s1]

**Supplementary data to:**

**Capacity assessment of urban green space for mitigating combined sewer overflows in the Tokyo metropolitan area**

Author: Ryohei Ogawa, Ye Zhang, Vouchlay Theng, Zhongyu Guo, Manna Wang, Chihiro  
Yoshimura \*

Department of Civil and Environmental Engineering, Tokyo Institute of Technology, Meguro-ku,  
Tokyo, 152-8552, Japan

\*Corresponding author

Email: [yoshimura.c.aa@m.titech.ac.jp](mailto:yoshimura.c.aa@m.titech.ac.jp); Phone: +81 03-5734-3548

**Table S1.** The data used in this study and their sources.

| Data                     |      | Data source                                                                                                                                         |
|--------------------------|------|-----------------------------------------------------------------------------------------------------------------------------------------------------|
| Topographic data         |      | Elevation Navigator for all of Japan<br><a href="https://www.hyoukou-ichiran.com/">https://www.hyoukou-ichiran.com/</a>                             |
| Land use/cover data      |      | Earth Observation Research Center (EORC)<br><a href="https://www.eorc.jaxa.jp/ALOS/jp/index_j.htm">https://www.eorc.jaxa.jp/ALOS/jp/index_j.htm</a> |
| Hydrological groups      | soil | National Land Information Database<br><a href="https://nlftp.mlit.go.jp/ksj/index.html">https://nlftp.mlit.go.jp/ksj/index.html</a>                 |
| Road network data        |      | Open Street Map Database<br><a href="https://www.openstreetmap.org/#map=5/35.588/134.380">https://www.openstreetmap.org/#map=5/35.588/134.380</a>   |
| Rainfall characteristics |      | Japan Meteorological Agency<br><a href="https://www.jma.go.jp/jma/index.html">https://www.jma.go.jp/jma/index.html</a>                              |

**Table S2.** Curve number (CN) for each land use type according to the USDA classification (2007) [1]. The hydrologic soil group was determined based on the surface soil group in the Tokyo metropolitan areas shown in **Figure 1(b)**. The hydrologic soil group was set as group A, and the curve number value was determined according to the SCS-CN (USDA-SCS, 1986) [2].

| Land use type                | CN value<br>(hydrologic soil group: A) |
|------------------------------|----------------------------------------|
| Commercial and business      | 89                                     |
| Industrial                   | 81                                     |
| Residential                  | 77                                     |
| Other urban area             | 77                                     |
| Rice paddy                   | 39                                     |
| Crops                        | 60                                     |
| Grassland                    | 49                                     |
| Deciduous broad-leaf forest  | 30                                     |
| Deciduous needle-leaf forest | 30                                     |
| Evergreen broad-leaf forest  | 30                                     |
| Evergreen needle-leaf forest | 30                                     |
| Bare land                    | 77                                     |
| Bamboo                       | 30                                     |
| Solar panel                  | 98                                     |

## References

52. USDA, 2007. National Engineering Handbook Chapter 7 Hydrologic Soil Groups, Natural Resources Conservation Service. Natl. Eng. Handb. 7-1,7-5. Available online: <https://directives.sc.egov.usda.gov/OpenNonWebContent.aspx?content=17757.wba> (accessed on 19 December 2022).
53. USDA-SCS, 1986. Urban Hydrology for Small Watersheds. Technical Release No. 55 (TR-55). USDASCS, Washington DC. Available online: <https://directives.sc.egov.usda.gov/OpenNonWebContent.aspx?content=22162.wba> (accessed on 19 December 2022).
